# Supplementary material for: CCAR2/DBC1 is required for Chk2-dependent KAP1 phosphorylation and repair of DNA damage
Source: PubMed Central journal article supplement (PMC4627348; doi:10.18632/oncotarget.4417), 2015-06-10
Supplement: oncotarget-06-17817-s001.pdf [file oncotarget-06-17817-s001.pdf]

# CCAR2/DBC1 is required for Chk2-dependent KAP1 phosphorylation and repair of DNA damage

## Supplementary Material

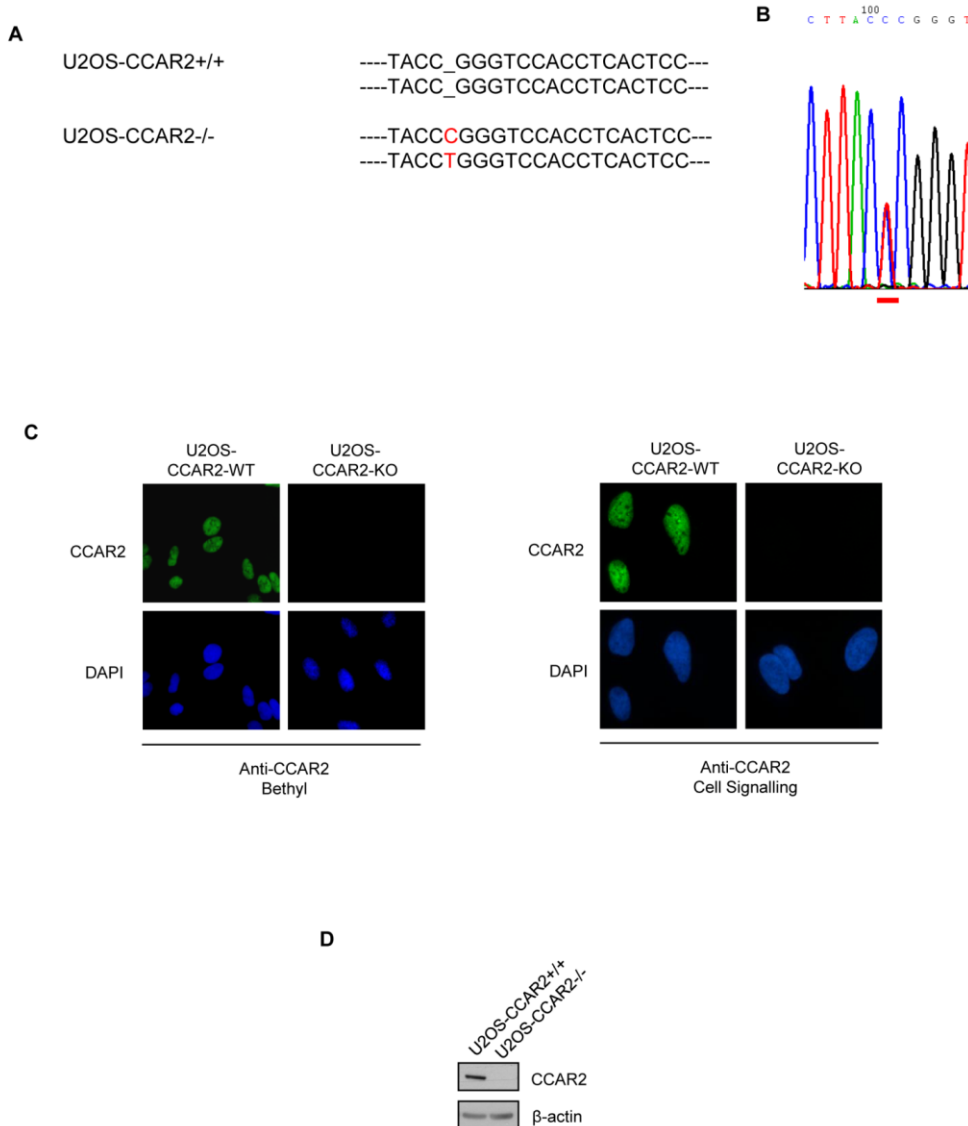

### Supplementary Figure 1. Validation of U2OS-CCAR2-/- cells.

U2OS cells knock-out for CCAR2 (U2OS-CCAR2-/-) were prepared using the CRISPR/Cas9 system. Sequence alignment of the clone used for our studies is shown in **A**, whereas sequence chromatogram is reported in **B**. Loss of CCAR2 protein was demonstrated by immunofluorescence (**C**) performed with two different antibodies, one recognizing an epitope at the N-terminus (right) and the other developed against a C-terminal sequence (left), and by western blot analyses (**D**).

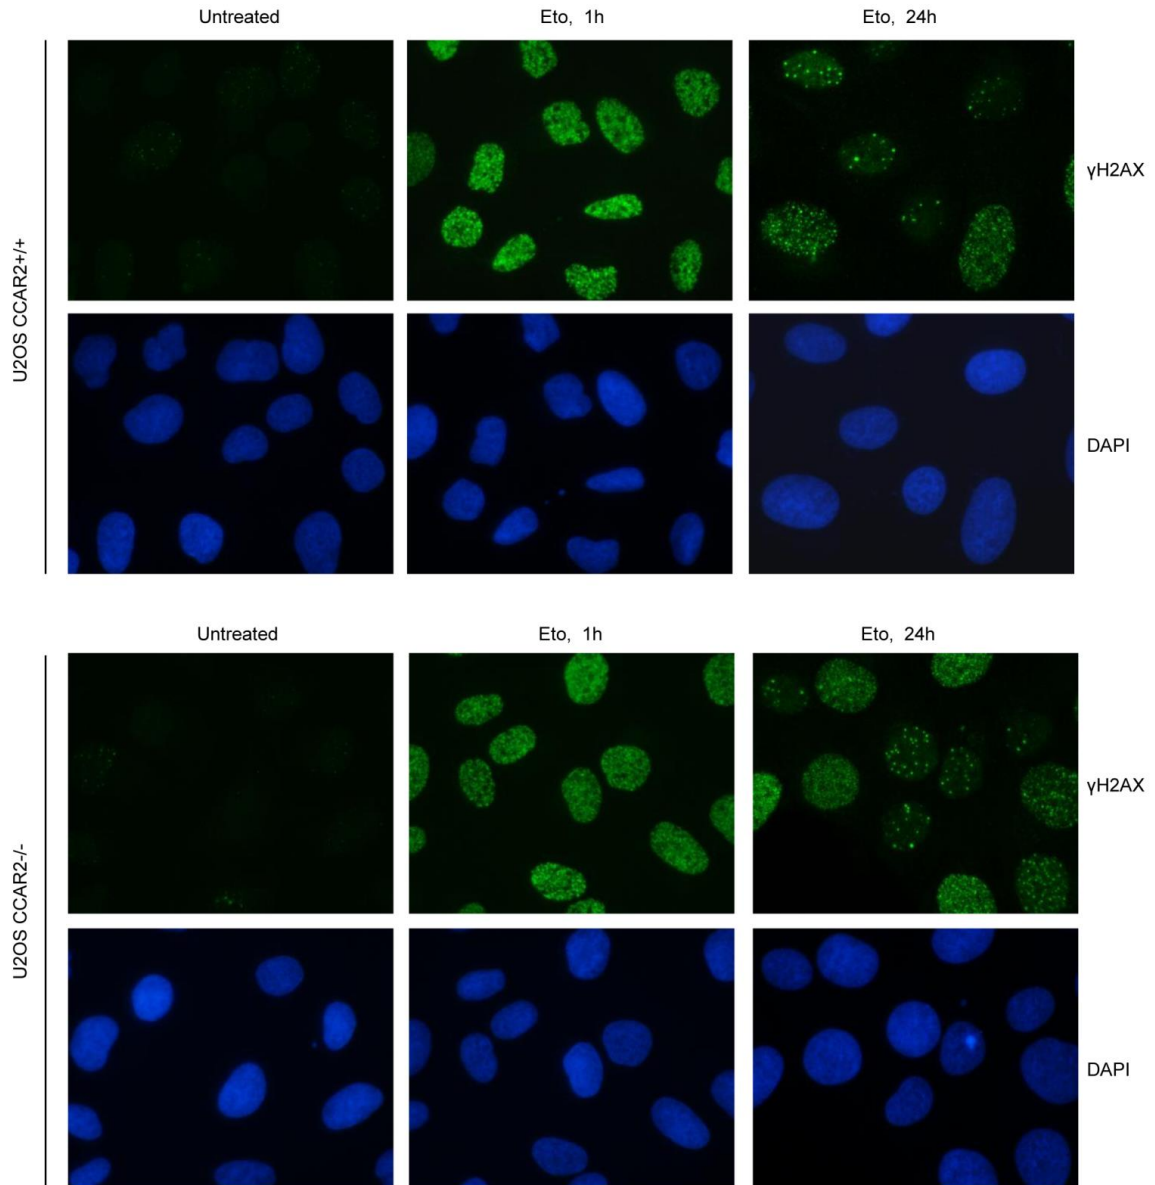

**Supplementary Figure 2. Analysis of  $\gamma$ H2AX foci in response to etoposide treatment.**

U2OS-CCAR2+/+ and U2OS-CCAR2-/- cells were treated with etoposide for 1h and released in drug-free medium for 24h;  $\gamma$ H2AX foci were analyzed by immunofluorescence.

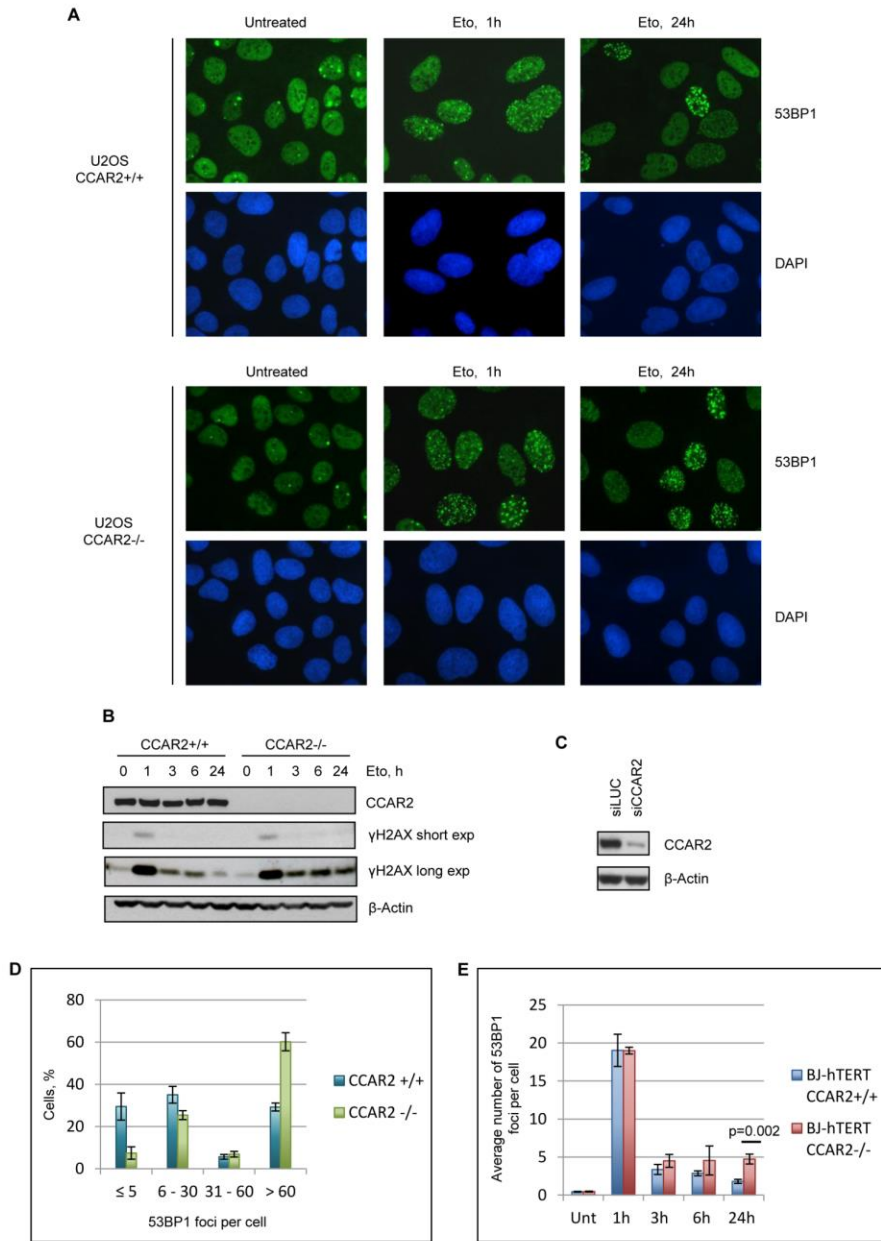

**Supplementary Figure 3. U2OS and BJ-hTERT CCAR2<sup>-/-</sup> cells show accumulation of 53BP1 foci and γH2AX levels.**

U2OS-CCAR2<sup>+/+</sup> and U2OS-CCAR2<sup>-/-</sup> cells were exposed for 1h to 20μM etoposide, washed and incubated in drug-free medium for the indicated time points. 53BP1 foci were analyzed by immunofluorescence (**A**) and γH2AX levels by western blot (**B**). Western blot showing CCAR2 depletion in U2OS cells (**C**). Chart depicting 53BP1 foci distribution in the population of U2OS CCAR2<sup>+/+</sup> and CCAR2<sup>-/-</sup> cells treated with etoposide for 1h and then released in drug-free medium for 24h (**D**). Time course analysis of 53BP1 foci in BJ-hTERT CCAR2<sup>+/+</sup> and CCAR2<sup>-/-</sup> cells exposed to etoposide for 1h and then released in drug-free medium for 3, 6 and 24h.

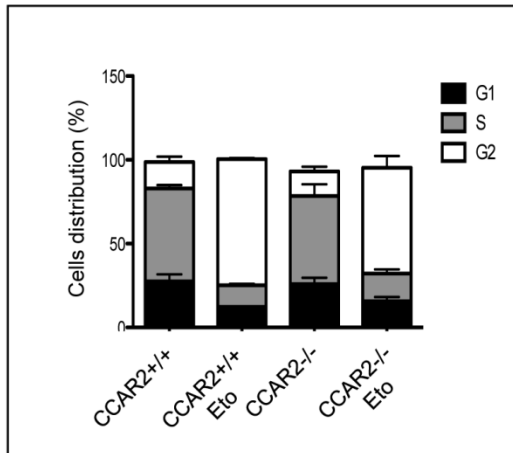

**Supplementary Figure 4. U2OS CCAR2+/+ and CCAR2-/- show similar cell cycle profiles.**

FACS analyses of U2OS-CCAR2+/+ and CCAR2-/- untreated or upon 1h etoposide treatment and release in drug-free medium for 24h.

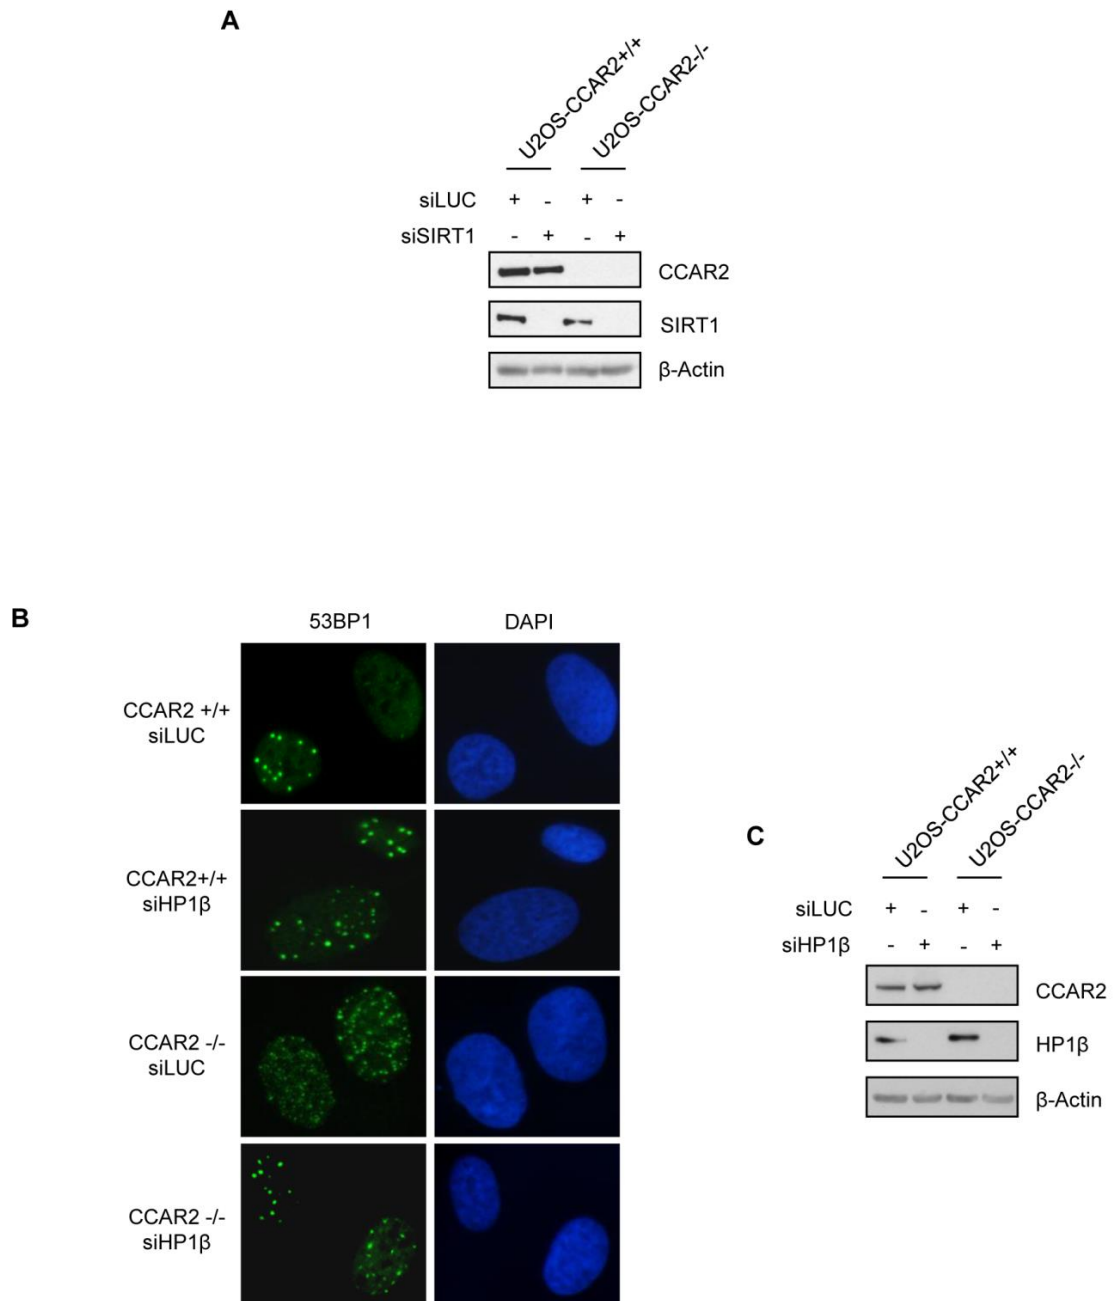

**Supplementary Figure 5. SIRT1 is not involved in CCAR2-mediated DNA repair.**

(A) Western blot analysis to detect SIRT1 depletion in CCAR2<sup>+/+</sup> and CCAR2<sup>-/-</sup> cells. (B) Example of 53BP1 staining of U2OS-CCAR2<sup>+/+</sup> and CCAR2<sup>-/-</sup> cells transfected with control or HP1β siRNA. (C) Western blot to detect HP1β depletion.

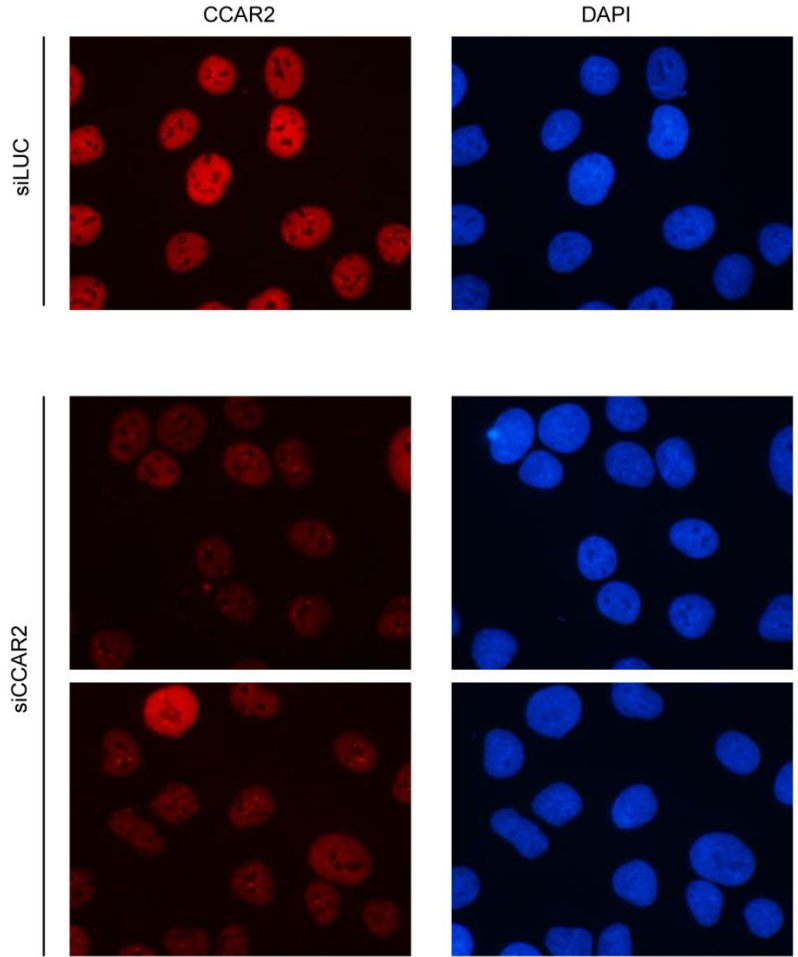

**Supplementary Figure 6. CCAR2 does not affect DNA repair in AID-DiVA cells.**

Immunofluorescence staining of AID-DiVA cells transfected with control or CCAR2 siRNA.

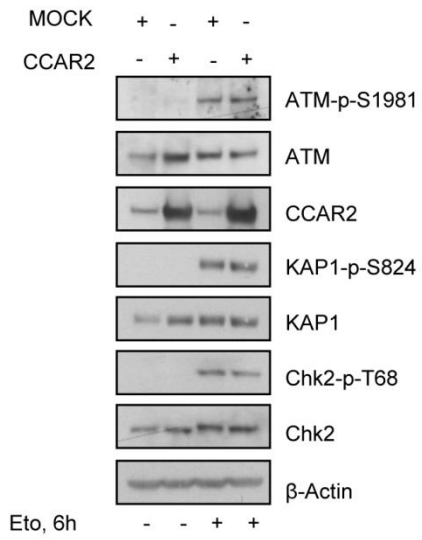

**Supplementary Figure 7. CCAR2 does not affect ATM activity.**

U2OS cells transfected with mock or CCAR2 encoding vectors and treated or not with etoposide were analyzed by WB with the indicated antibodies.

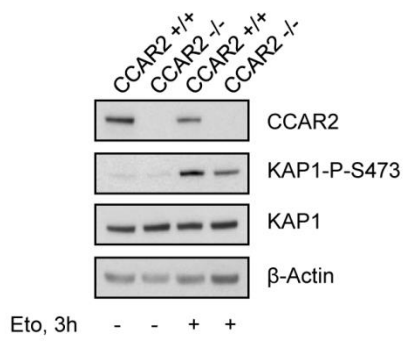

**Supplementary Figure 8. CCAR2 absence reduces KAP1 phosphorylation on S473.**

BJ-hTERT-CCAR2<sup>+/+</sup> and CCAR2<sup>-/-</sup> cells were treated with etoposide for 3h and the phosphorylation of KAP1 on S473 was analyzed by western blot.



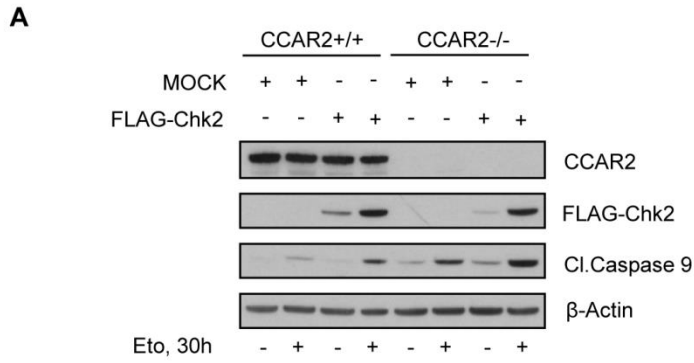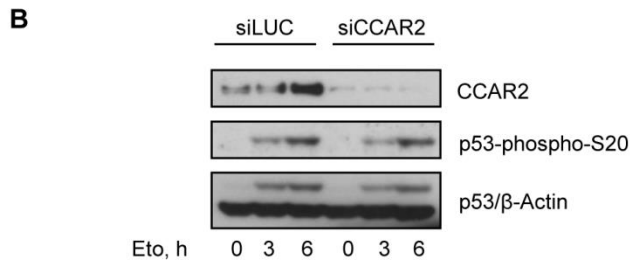

**Supplementary Figure 9. Chk2-dependent apoptosis and p53 phosphorylation in CCAR2<sup>+/+</sup> and CCAR2<sup>-/-</sup> cells.**

(A) Chk2 protein was overexpressed in CCAR2<sup>+/+</sup> and CCAR2<sup>-/-</sup> cells and apoptosis was analyzed in response to etoposide treatment by evaluation of caspase 9 cleavage. (B) p53-S20 phosphorylation was analyzed in U2OS cells transfected with control or CCAR2 siRNA and exposed to etoposide for the indicated time points.

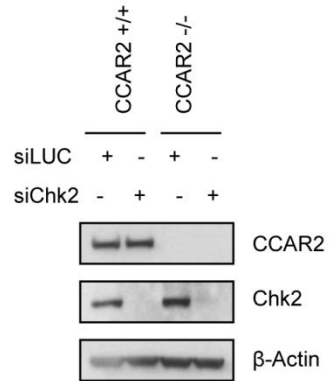

**Supplementary Figure 10. Chk2 depletion affects DNA damage repair.**

Western blot analyses of U2OS-CCAR2+/+ and CCAR2-/- cells transfected with control or Chk2 siRNAs.
